# Supplementary material for: The Urbanisation Impacts on the Policy Effects of the Carbon Tax in China
Source: MDPI journal article supplement (doi:10.3390/su13126749), 2021-06-15
Supplement: s1 [file s1]

## Supplementary Materials

**Table S1.** The Results of the ADF and PP Unit Root Tests.

| Variable | Difference     | Test Type | Test Statistic | <i>p</i> -Value | Unit Root |
|----------|----------------|-----------|----------------|-----------------|-----------|
| $CE_t$   | Level          | ADF       | 1.7884         | 0.9799          | Yes       |
|          | Level          | PP        | 5.106          | 1.0000          | Yes       |
|          | 1st Difference | ADF       | 5.1063         | 0.1398          | Yes       |
|          | 1st Difference | PP        | -2.9581 **     | 0.0496          | No        |
|          | 2nd Difference | ADF       | -6.0321 **     | <0.0001         | No        |
|          | 2nd Difference | PP        | -5.9938 **     | <0.0001         | No        |
| $EC_t$   | Level          | ADF       | 2.2007         | 0.9919          | Yes       |
|          | Level          | PP        | 6.0094         | 1.0000          | Yes       |
|          | 1st Difference | ADF       | -2.6899        | 0.0868          | Yes       |
|          | 1st Difference | PP        | -2.7983        | 0.0694          | Yes       |
|          | 2nd Difference | ADF       | -4.7189        | <0.0001 **      | No        |
|          | 2nd Difference | PP        | -4.8227        | <0.0001 **      | No        |
| $GDP_t$  | Level          | ADF       | -4.6337        | 0.0043 **       | No        |
|          | Level          | PP        | 17.5476        | 1.0000          | Yes       |
|          | 1st Difference | ADF       | -4.2926        | 0.0020 **       | No        |
|          | 1st Difference | PP        | -3.4069        | 0.0179 **       | No        |
| $UR_t$   | Level          | ADF       | 1.2044         | 0.9382          | Yes       |
|          | Level          | PP        | -1.9441        | 0.3091          | Yes       |
|          | 1st Difference | ADF       | -1.6131        | 0.0996          | Yes       |
|          | 1st Difference | PP        | -1.5427        | 0.1137          | Yes       |
|          | 2nd Difference | ADF       | -4.6672        | <0.0001 **      | No        |
|          | 2nd Difference | PP        | -4.6672        | <0.0001 **      | No        |

Note: \*\* denotes statistical significance at the 5% level.

**Table S2.** The Results of the DF-GLS Unit Root Tests.

| Variable | Form           | DF-GLS statistic | 5% Critical Value | Unit Root |
|----------|----------------|------------------|-------------------|-----------|
| $CE_t$   | Level          | -2.6326          | -3.1900           | Yes       |
|          | 1st Difference | -2.5635          | -3.1900           | Yes       |
|          | 2nd Difference | -4.8469          | -3.1900           | No        |
| $EC_t$   | Level          | -2.8369          | -3.1900           | Yes       |
|          | 1st Difference | -2.6474          | -3.1900           | Yes       |
|          | 2nd Difference | -4.1626          | -3.1900           | No        |
| $GDP_t$  | Level          | -4.7775          | -3.1900           | No        |
|          | 1st Difference | -3.9797          | -3.1900           | No        |
| $UR_t$   | Level          | -2.3689          | -3.1900           | Yes       |
|          | 1st Difference | -2.2271          | -3.1900           | Yes       |
|          | 2nd Difference | -4.9200          | -3.1900           | No        |

**Table S3.** The P-values of the White and Breusch-Godfrey LM Tests.

| Test               | $\Delta^2 CE_t$ | $\Delta^2 EC_t$ | $\Delta GDP_t$ |
|--------------------|-----------------|-----------------|----------------|
| White              | 0.8423          | 0.9971          | 0.4102         |
| Breusch-Godfrey LM | 0.2377          | 0.7495          | 0.0803         |

**Table S4.** The VIF Scores of the ARDL Models.

| Dependent       | Independent         | Uncentered VIF |
|-----------------|---------------------|----------------|
| $\Delta^2 CE_t$ | $\Delta^2 CE_{t-1}$ | 2.1935         |
|                 | $\Delta^2 EC_t$     | 1.5042         |
|                 | $\Delta^2 EC_{t-1}$ | 1.4716         |
|                 | $\Delta GDP_t$      | 1.8013         |
|                 | $\Delta^2 UR_t$     | 1.5188         |
| $\Delta^2 EC_t$ | $\Delta^2 EC_{t-1}$ | 1.9360         |
|                 | $\Delta^2 CE_t$     | 2.2258         |
|                 | $\Delta^2 CE_{t-1}$ | 2.7091         |
|                 | $\Delta GDP_t$      | 2.2458         |
|                 | $\Delta^2 UR_t$     | 1.8326         |
| $\Delta GDP_t$  | $\Delta GDP_{t-1}$  | 37.5551        |
|                 | $\Delta GDP_{t-2}$  | 46.8721        |
|                 | $\Delta CE_t$       | 44.5444        |
|                 | $\Delta EC_t$       | 52.9756        |
|                 | $\Delta UR_t$       | 37.0162        |

**Table S5.** The Results of the Jarque-Bera Normality Tests.

| Dependent Variable | $\Delta^2 CE_t$ | $\Delta GDP_t$ |
|--------------------|-----------------|----------------|
| <i>p</i> -values   | 0.6161          | 0.3687         |

**Table S6.** The Sensitivity Analysis of the Urbanisation Impacts on the 1% Carbon Tax in 2015.

| Parametric Change | −50%    | −20%    | −10%   | 10%    | 20%    | 50%     |
|-------------------|---------|---------|--------|--------|--------|---------|
| Carbon Emissions  | 21.01%  | 7.15%   | 3.41%  | −3.12% | −5.98% | −13.33% |
| Carbon Intensity  | 0.92%   | 0.34%   | 0.17%  | −0.16% | −0.31% | −0.71%  |
| GDP Loss          | −35.16% | −11.98% | −5.71% | 5.23%  | 10.05% | 22.46%  |
| Welfare Loss      | −35.30% | −12.02% | −5.73% | 5.24%  | 10.05% | 22.42%  |
| ASCC              | 1.15%   | 0.54%   | 0.28%  | −0.29% | −0.59% | −1.51%  |

**Table S7.** The Sensitivity Analysis of the Urbanisation Impacts on the 1% Carbon Tax in 2030.

| Parametric Change | −50%    | −20%    | −10%   | 10%    | 20%    | 50%     |
|-------------------|---------|---------|--------|--------|--------|---------|
| Carbon Emissions  | 14.46%  | 5.16%   | 2.49%  | −2.33% | −4.52% | −10.33% |
| Carbon Intensity  | 0.76%   | 0.30%   | 0.15%  | −0.15% | −0.29% | −0.72%  |
| GDP Loss          | −36.38% | −12.96% | −6.25% | 5.85%  | 11.33% | 25.91%  |
| Welfare Loss      | −36.60% | −13.06% | −6.31% | 5.90%  | 11.43% | 26.16%  |
| ASCC              | 0.31%   | 0.11%   | 0.05%  | −0.05% | −0.09% | −0.19%  |

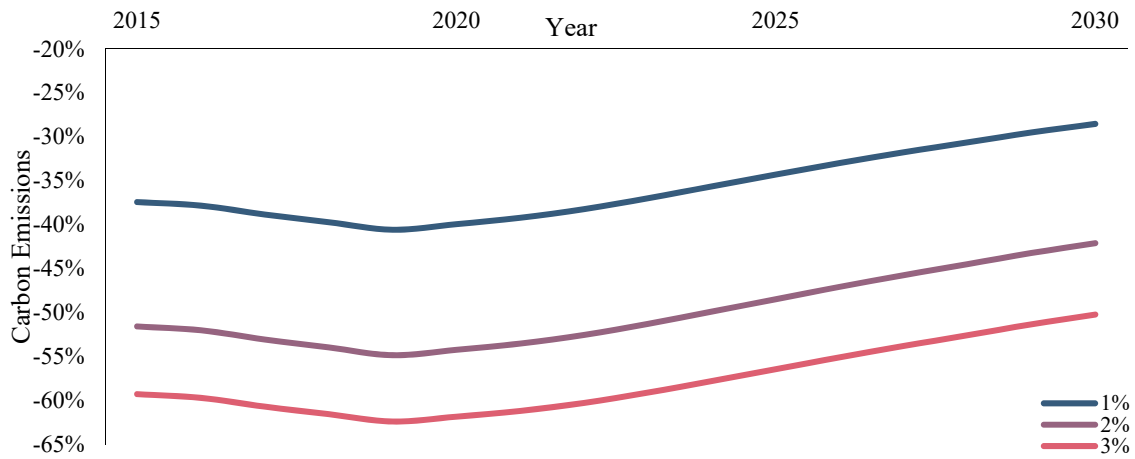

**Figure S1.** The Tax Effect on the Carbon Emissions Compared to the Baseline Scenario.

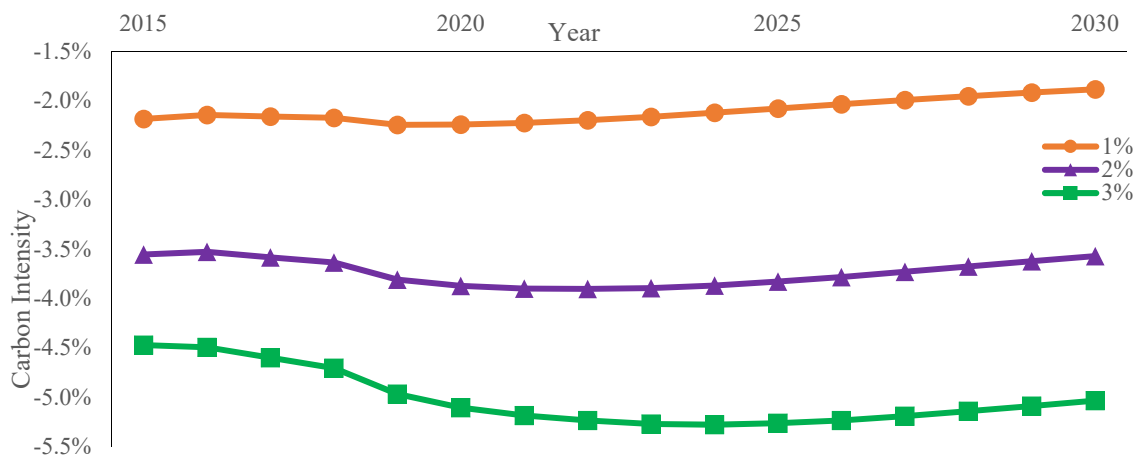

**Figure S2.** The Tax Effect on the Carbon Intensity Compared to the Baseline Scenario.

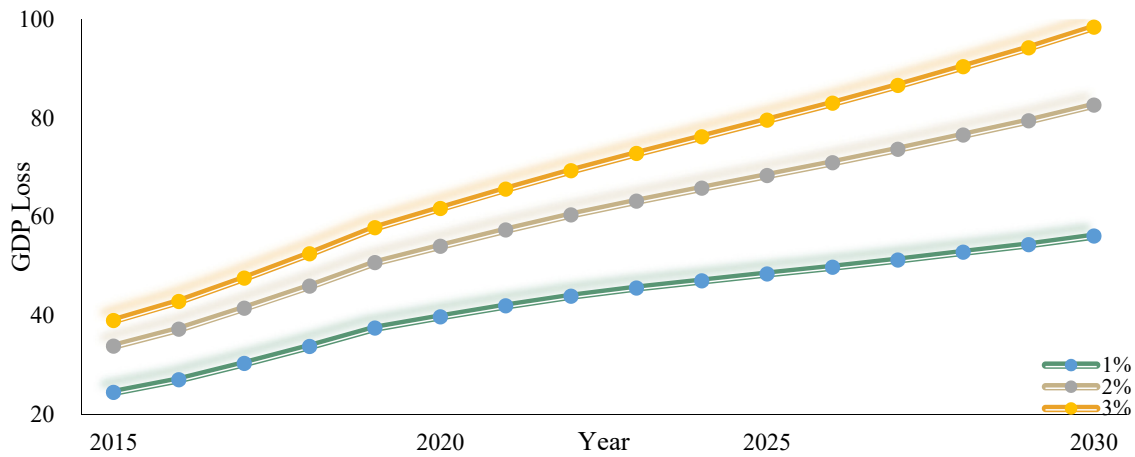

**Figure S3.** The Policy Effect of the Carbon Tax on the GDP Loss (Unit:  $10^{12}$  CNY).

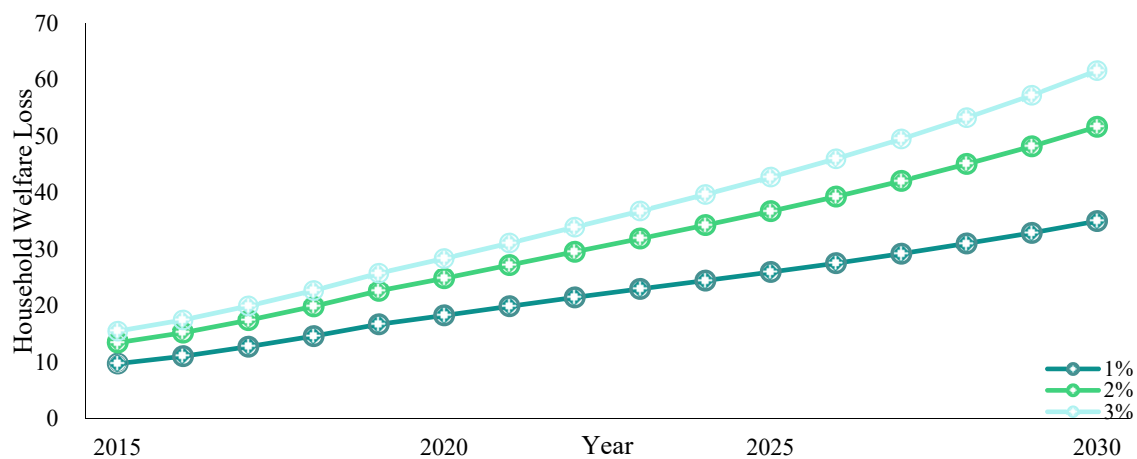

**Figure S4.** The Policy Effect of the Carbon Tax on the Household Welfare Loss (Unit:  $10^{12}$  CNY).

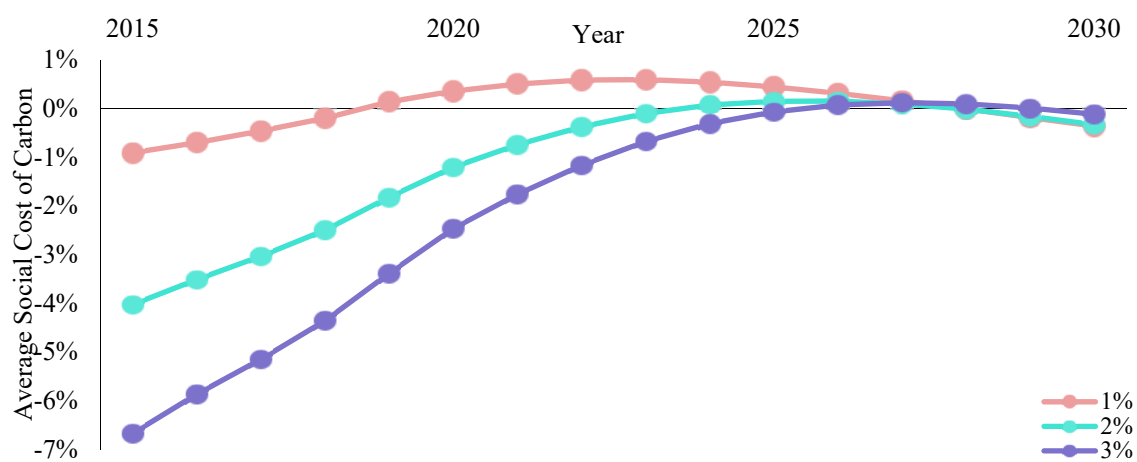

**Figure S5.** The Policy Effect of the Carbon Tax on the ASCC Compared to the Baseline Scenario.
